# Supplementary material for: GPX4 suppresses ferroptosis to promote malignant progression of endometrial carcinoma via transcriptional activation by ELK1
Source: PubMed Central journal article supplement (PMC9373394; doi:10.1186/s12885-022-09986-3), 2022-08-12
Supplement: 12885_2022_9986_MOESM1_ESM.pdf [file 12885_2022_9986_MOESM1_ESM.pdf]

**Supplementary Table 2** The prediction binding domain between ELK1 and GPX4

| <b>Gene name</b> | <b>Start</b> | <b>End</b> | <b>Strand</b> | <b>Predicted sequence</b> |
|------------------|--------------|------------|---------------|---------------------------|
| ELK1             | 1845         | 1854       | -             | ACCGGACGTG                |
| ELK1             | 1028         | 1037       | +             | GCCGGATGCG                |
