# Supplementary material for: GPX4 suppresses ferroptosis to promote malignant progression of endometrial carcinoma via transcriptional activation by ELK1
Source: PubMed Central journal article supplement (PMC9373394; doi:10.1186/s12885-022-09986-3), 2022-08-12

Fig. 1D

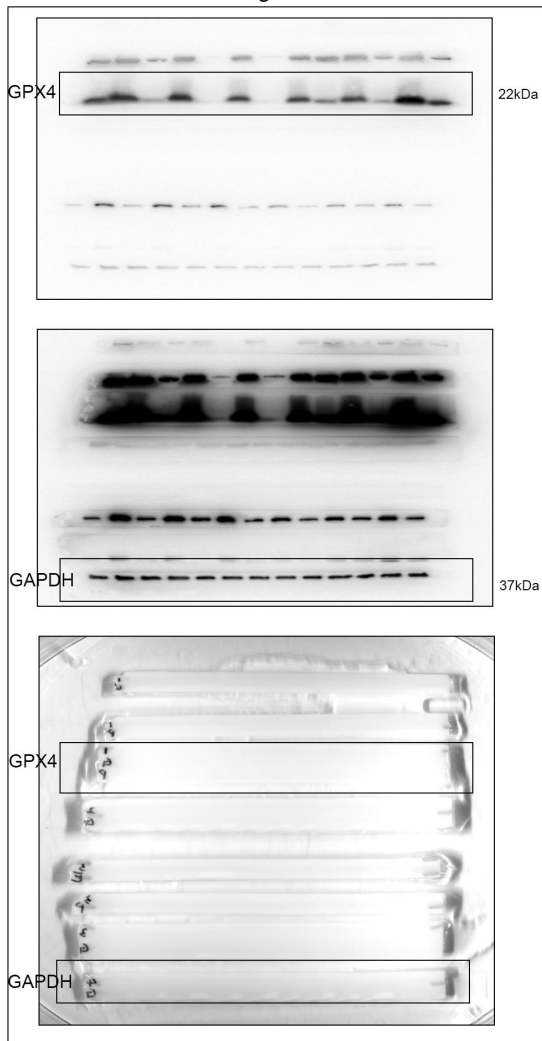

Fig. 2B

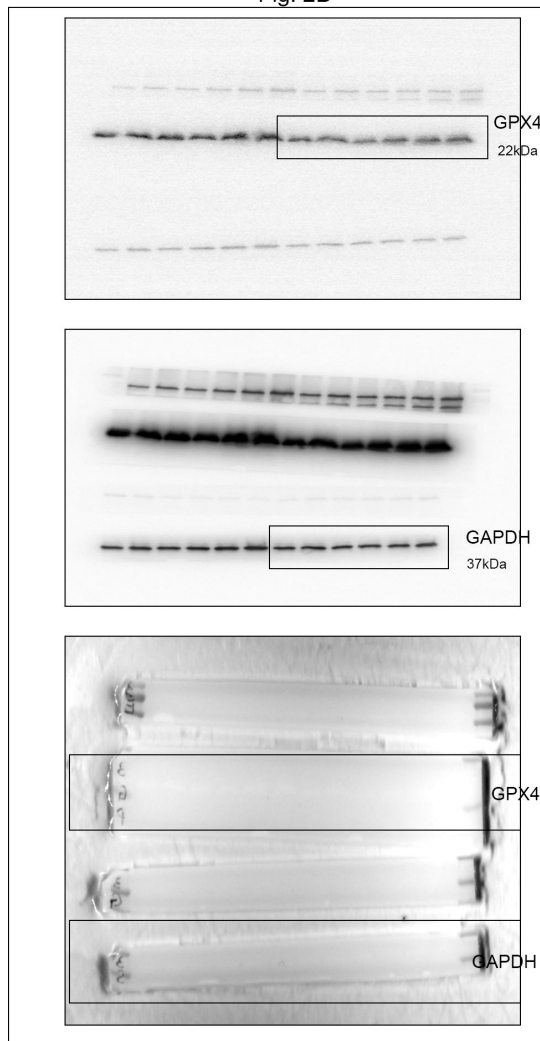

Fig. 2D

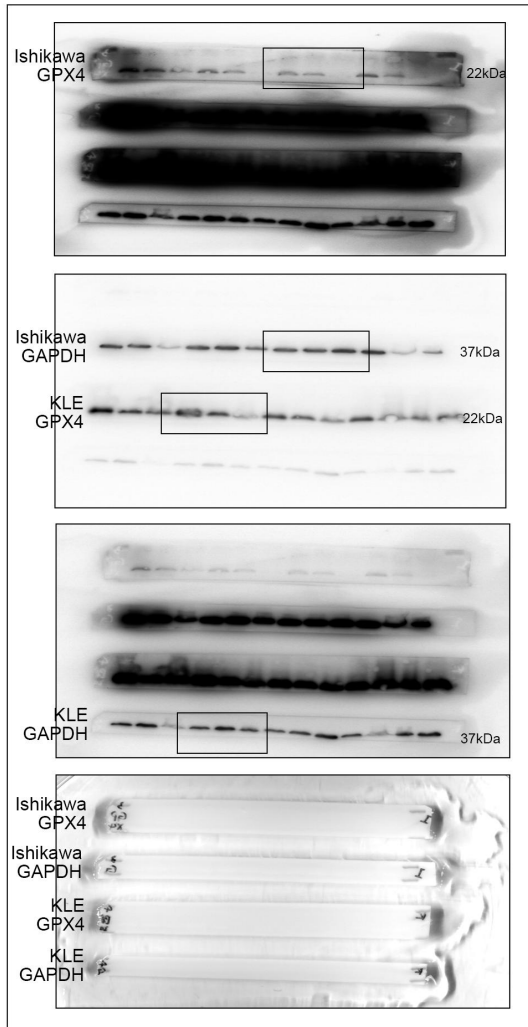

Fig. 6D

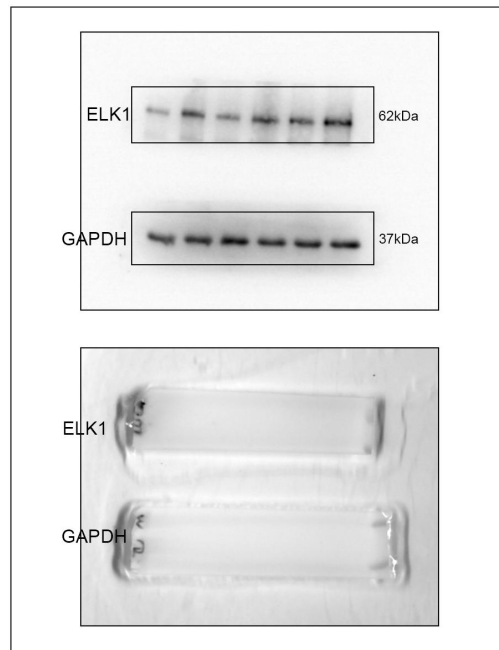

Fig. 6J

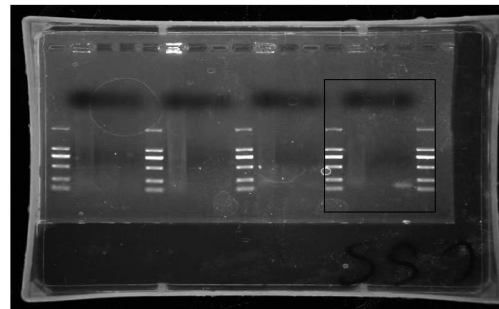

Supplement: 12885_2022_9986_MOESM2_ESM.pdf [file 12885_2022_9986_MOESM2_ESM.pdf]
